# Supplementary figures and images for: On the molecular basis of H2O/DMSO eutectic mixtures by using phenol compounds as molecular sensors: a combined NMR and DFT study
Source: Royal Society of Chemistry journal article supplement (doi:10.1039/d0cp05861k), 2021-01-01

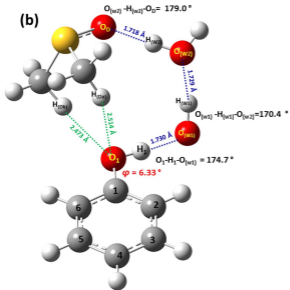

Supplement: d0cp05861k10.pdf [file d0cp05861k10.pdf]

(c)

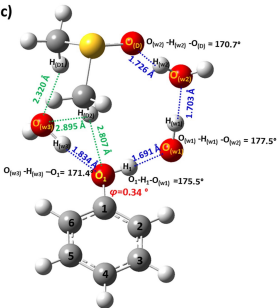

Supplement: d0cp05861k11.pdf [file d0cp05861k11.pdf]

(b)

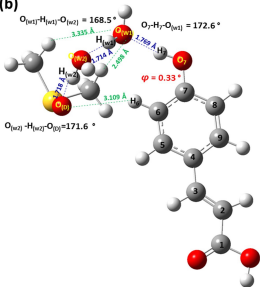

Supplement: d0cp05861k14.pdf [file d0cp05861k14.pdf]

(a)

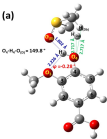

Supplement: d0cp05861k18.pdf [file d0cp05861k18.pdf]

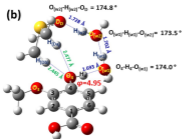

Supplement: d0cp05861k19.pdf [file d0cp05861k19.pdf]

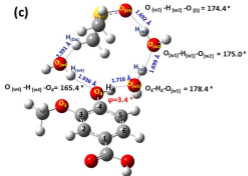

Supplement: d0cp05861k20.pdf [file d0cp05861k20.pdf]

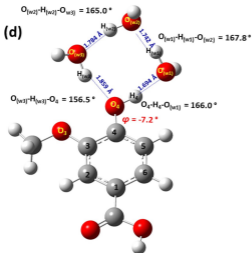

Supplement: d0cp05861k21.pdf [file d0cp05861k21.pdf]

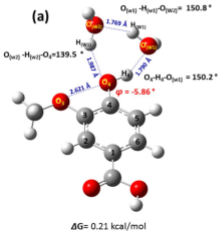

Supplement: d0cp05861k23.pdf [file d0cp05861k23.pdf]

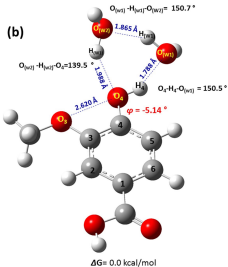

Supplement: d0cp05861k24.pdf [file d0cp05861k24.pdf]

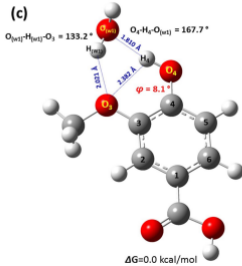

Supplement: d0cp05861k25.pdf [file d0cp05861k25.pdf]

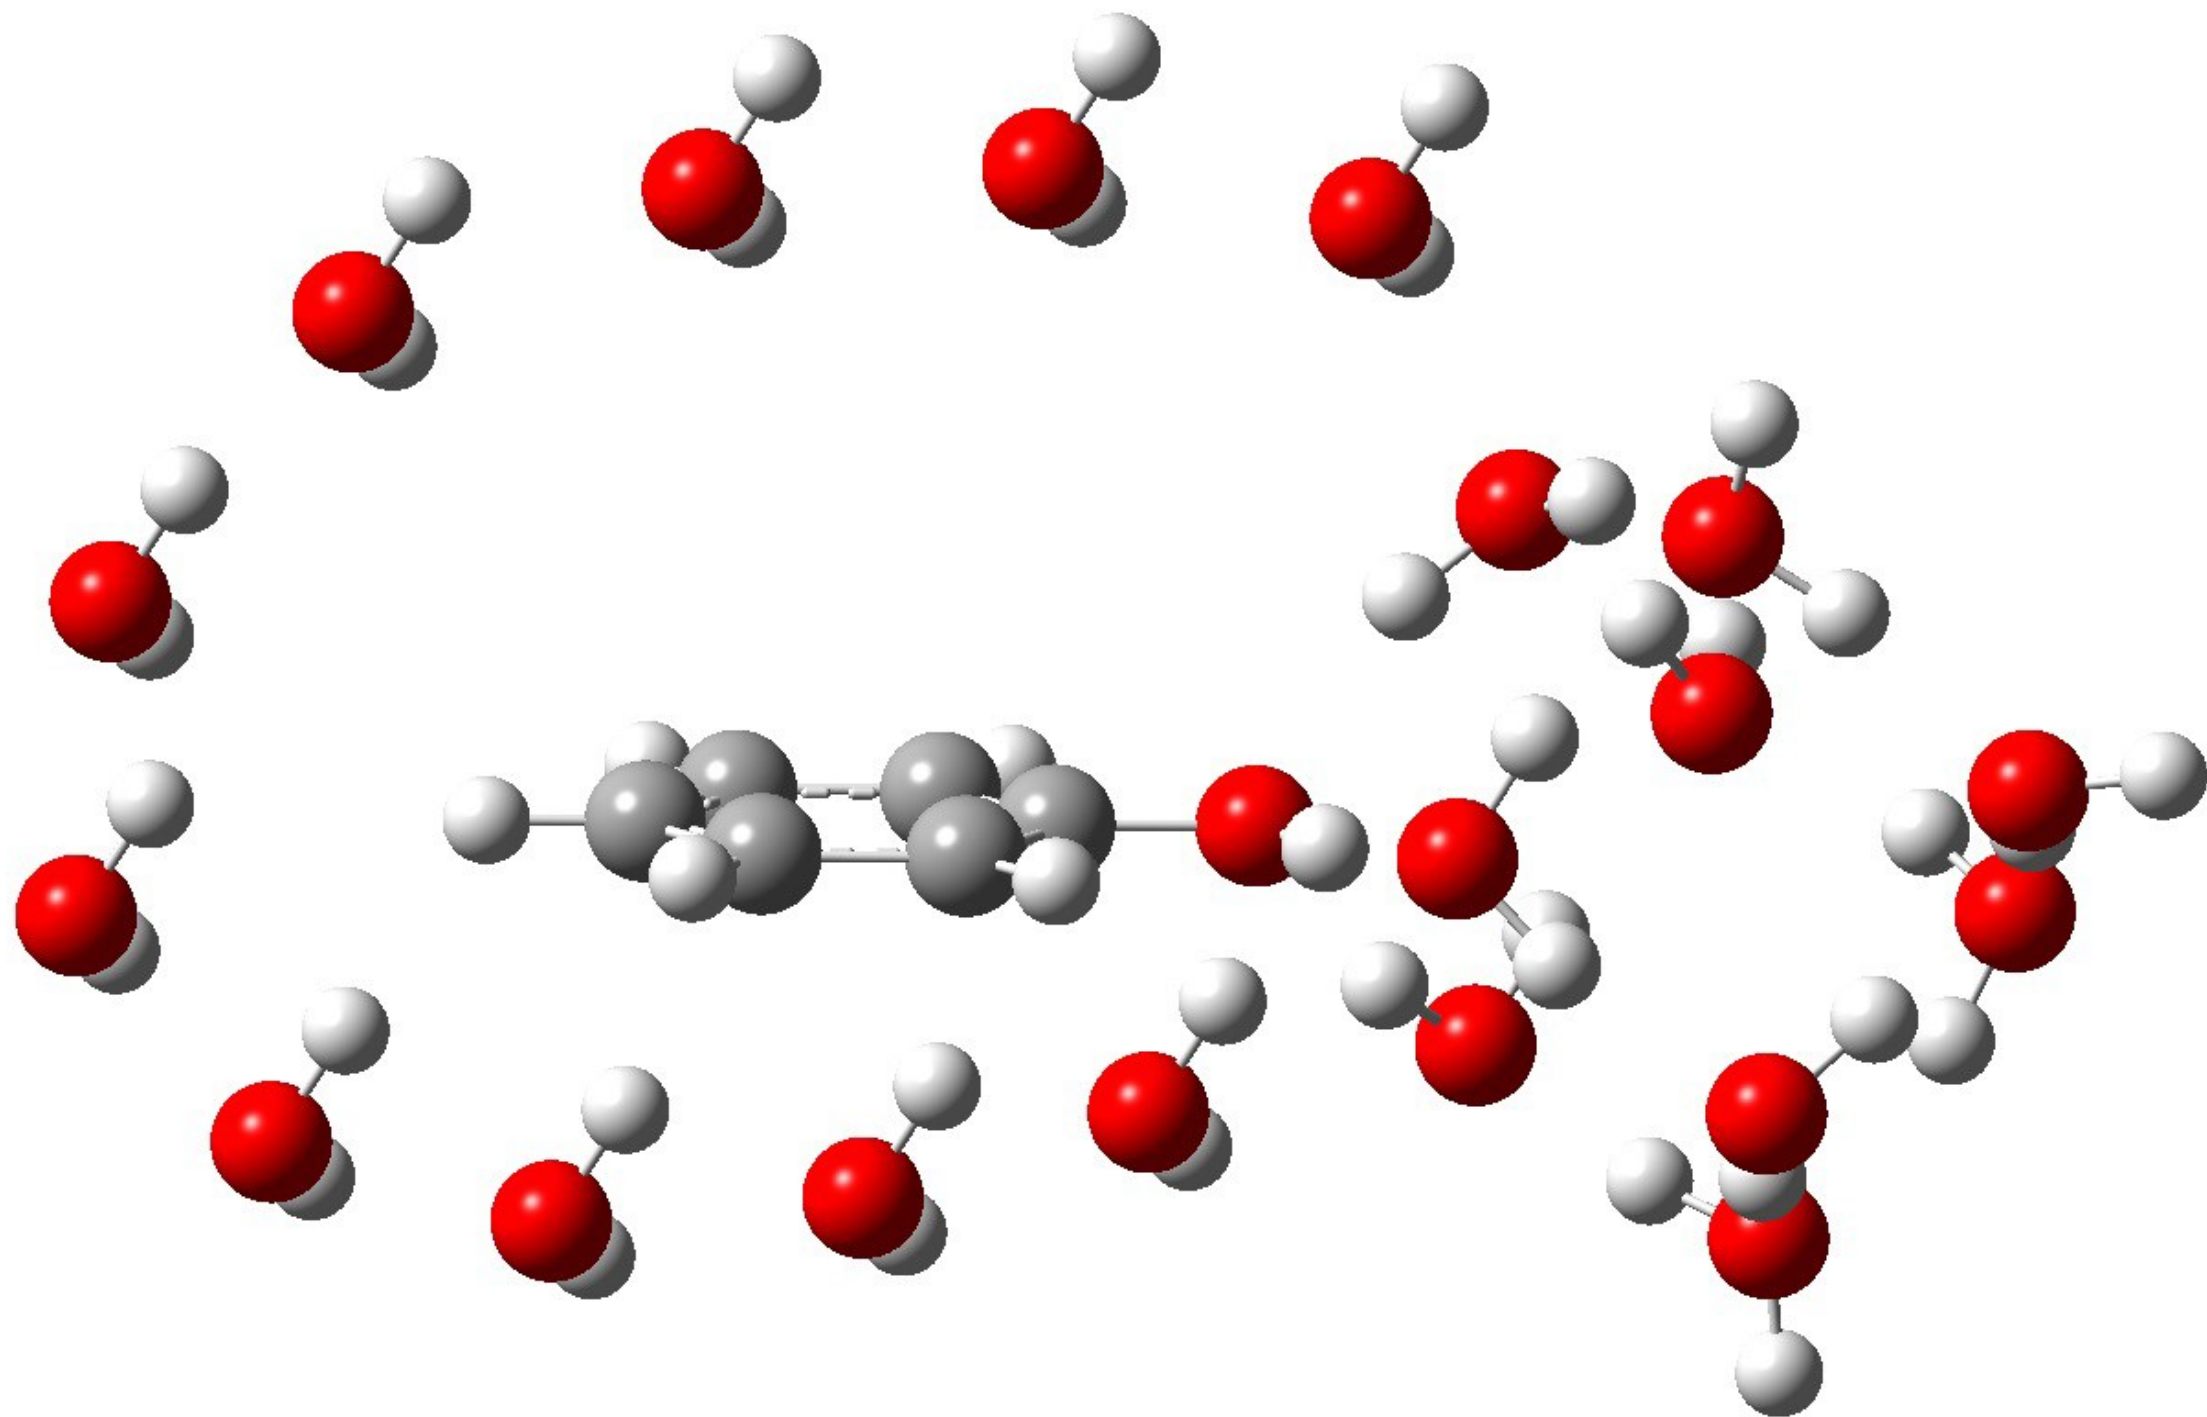

Supplement: d0cp05861k27.pdf [file d0cp05861k27.pdf]

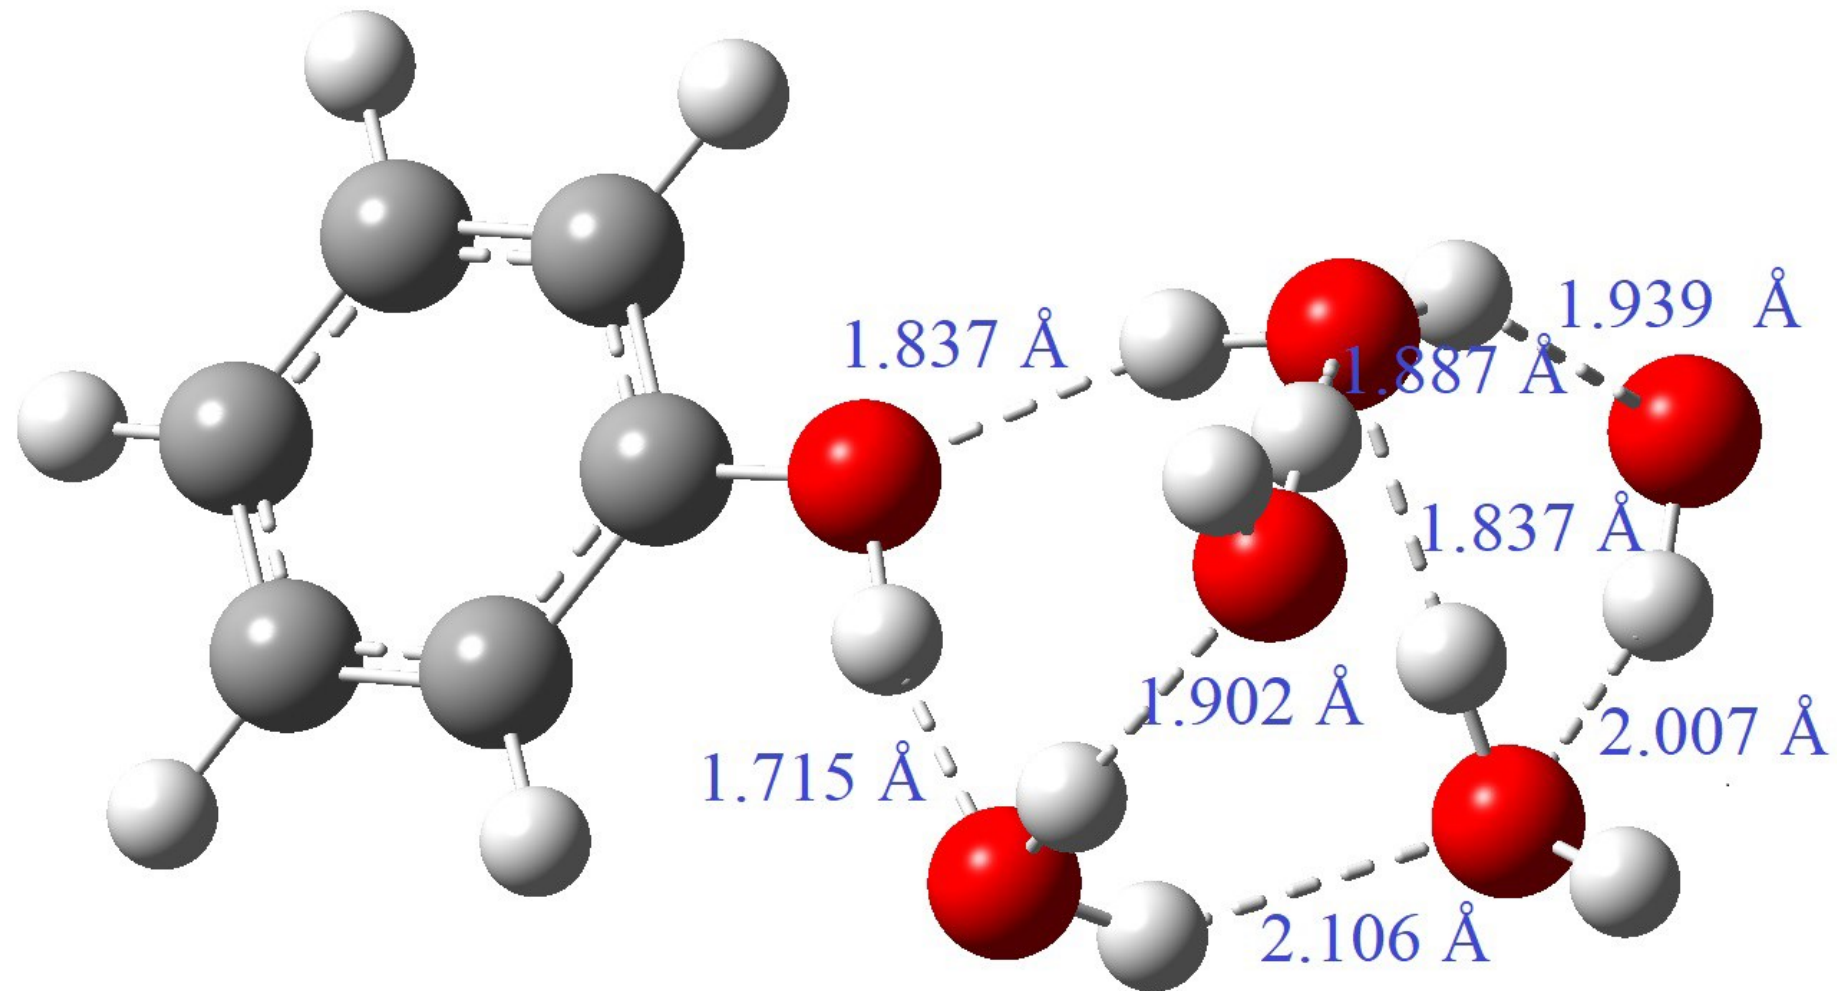

Supplement: d0cp05861k30.pdf [file d0cp05861k30.pdf]
